# Supplementary material for: Ni3P as a high-performance catalytic phase for the hydrodeoxygenation of phenolic compounds
Source: Royal Society of Chemistry journal article supplement (doi:10.1039/c7gc03262e), 2018-01-01
Supplement: c7gc03262e1.pdf [file c7gc03262e1.pdf]

# **Ni<sub>3</sub>P as a High-Performance Catalytic Phase for Hydrodeoxygenation of Phenolic Compounds**

Zhiquan Yu,<sup>a</sup> Yao Wang,<sup>a</sup> Zhichao Sun,<sup>a</sup> Xiang Li,<sup>a</sup> Anjie Wang,<sup>a\*</sup> Donald M. Camaioni,<sup>b</sup> and  
Johannes A. Lercher<sup>b</sup>

<sup>a</sup> State Key Laboratory of Fine Chemicals, School of Chemical Engineering, Dalian University  
of Technology, No.2 Linggong Road, Dalian 116024, P. R. China

<sup>b</sup> Institute for Integrated Catalysis, Pacific Northwest National Laboratory, P.O. Box 999,  
Richland, Washington 99352, United States

## Experimental

### Catalyst preparation

Unsupported Ni<sub>3</sub>P was synthesised from the oxide precursor by *in situ* H<sub>2</sub> temperature programmed reduction (TPR) method. The oxide precursor was prepared as follows. 13.2 g Ni(NO<sub>3</sub>)<sub>2</sub>·6H<sub>2</sub>O was dissolved in deionized water under stirring to form a clear green solution, and the aqueous solution containing 2.0 g (NH<sub>4</sub>)<sub>2</sub>HPO<sub>4</sub> was then added dropwise under stirring to form a slurry. Afterward, the resultant slurry was heated to evaporate water to obtain a solid product. The product was dried at 120 °C for 12 h and calcined at 500 °C for 3 h. The catalysts were obtained *in situ* by reducing the oxide precursors in hydrogen in the reactor prior to the HDO reaction.

### Catalytic HDO

In the aqueous HDO of phenolic compounds catalyzed by Ni<sub>3</sub>P, Ni and Pd/SiO<sub>2</sub> (1.0 wt% Pd), Program 2 was used to investigate the dependence of HDO activity on temperature. The HDO reactions were measured under 4.0 MPa H<sub>2</sub>, with a flow rate of 100 mL·min<sup>-1</sup> H<sub>2</sub> and 0.1 mL·min<sup>-1</sup> liquid feed (flowrate=0.005 g-phenol·min<sup>-1</sup>). After the reaction system had achieved a steady state (2 h), liquid product was sampled from the gas-liquid separator. The organic products in the sample were extracted by dichloromethane and dehydrated by anhydrous magnesium sulfate. The dried products were analyzed by a gas chromatograph (GC, Agilent 6890, flame ionization detector) with a HP-INNOWax capillary column (30 m × 320 μm × 0.5 μm). The GC detecting conditions were as follows: N<sub>2</sub> as the carrier gas; injection port temperature = 280 °C; detector temperature = 280 °C; initial column temperature = 120 °C, heating up to 230 °C with a heating rate of 10 °C·min<sup>-1</sup>, and stayed at 230 °C for 3 min.

To compare the catalytic performance of unsupported Ni<sub>3</sub>P between aqueous and oil phase HDO of phenol, the content of phenol in water was reduced from 5.0 to 1.0 wt%, while the other conditions were not changed.

The thermodynamic equilibrium conversion from phenol to cyclohexanol was calculated by the minimization of the Gibbs free energy, which was made in Aspen Plus 2006 V8.4. The simulation conditions were consistent with the catalytic aqueous phase HDO conditions.

## Results and Discussion

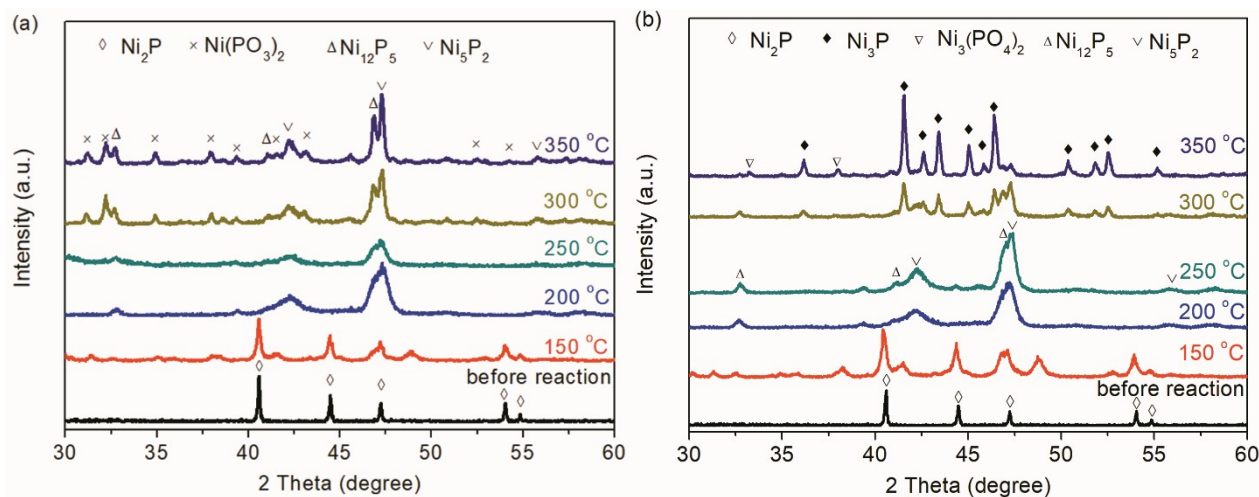

**Fig. S1** XRD patterns of the spent catalysts after treatment in water for 2.5 h at various temperatures in comparison with those of fresh  $\text{Ni}_2\text{P}$  using (a) Program 1 and (b) Program 2.

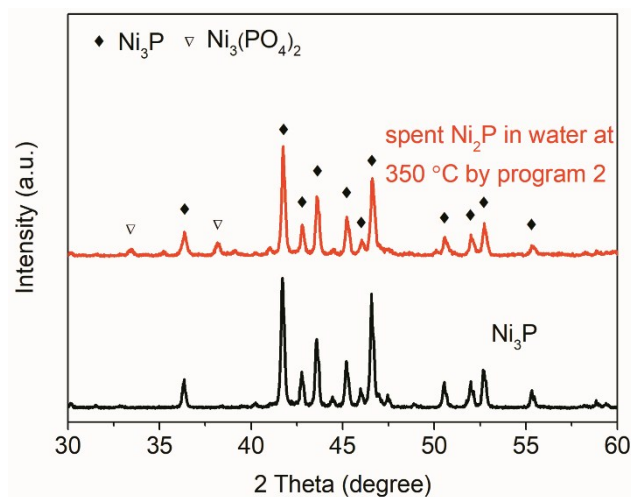

**Fig. S2** XRD pattern of the synthesized unsupported  $\text{Ni}_3\text{P}$  in comparison with the spent catalyst after treatment in water at 350 °C by Program 2.

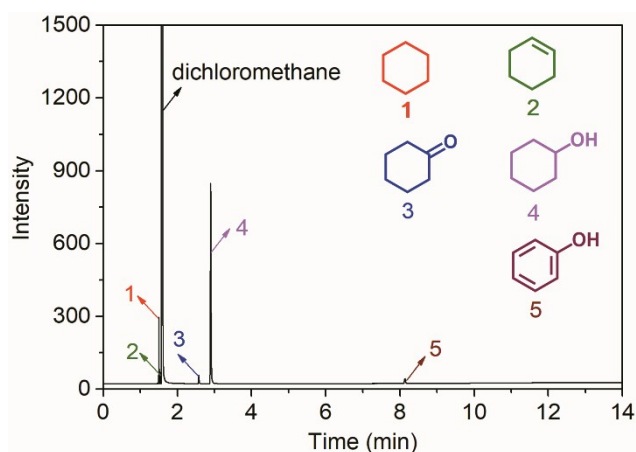

**Fig. S3** Representative gas chromatogram of the liquid product from aqueous phase HDO of phenol.

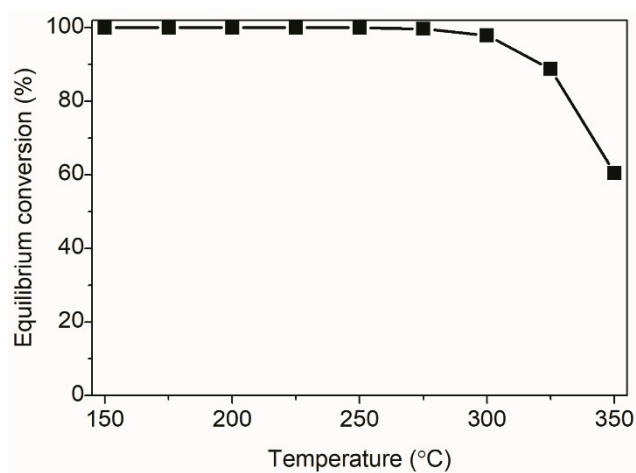

**Fig. S4** The equilibrium conversion of phenol hydrogenation to cyclohexanol as a function of temperature.

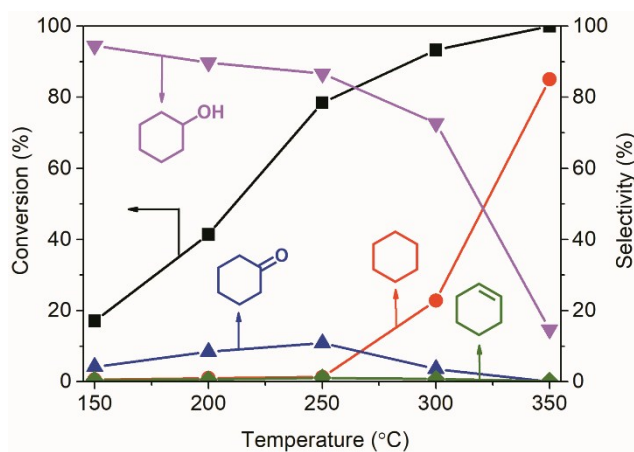

**Fig. S5** Catalytic performance of unsupported Ni in aqueous phase HDO of phenol.

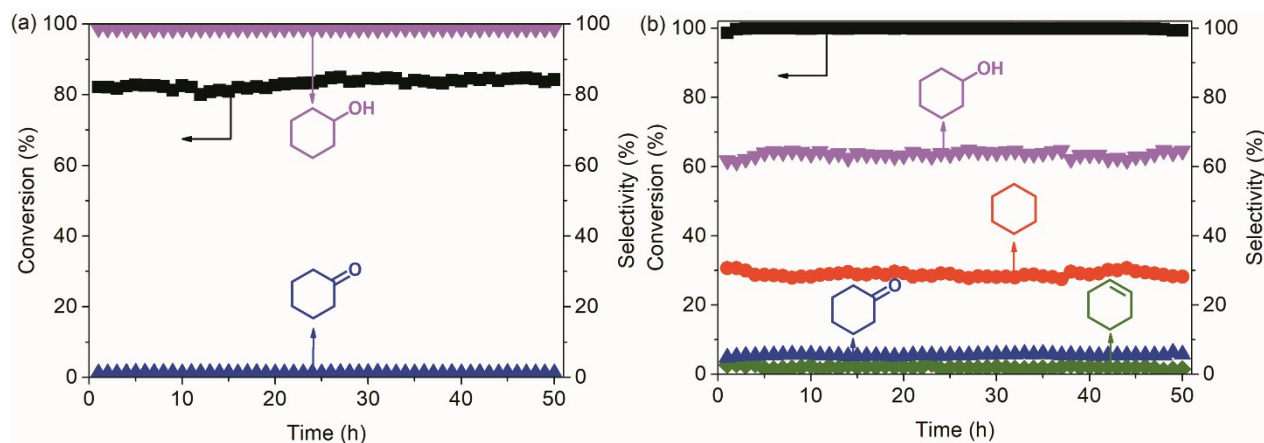

**Fig. S6** Variation of phenol conversion and product selectivities with time on stream in aqueous phase HDO over unsupported Ni<sub>3</sub>P at 150 °C (a) and 300 °C (b).

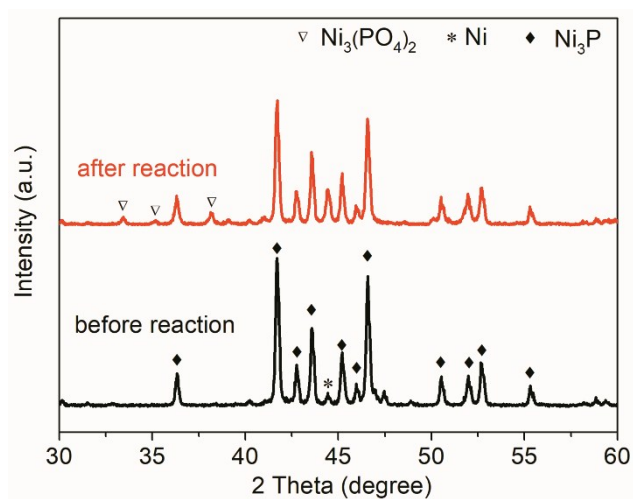

**Fig. S7** XRD patterns of unsupported  $\text{Ni}_3\text{P}$  before and after the 50-h run.

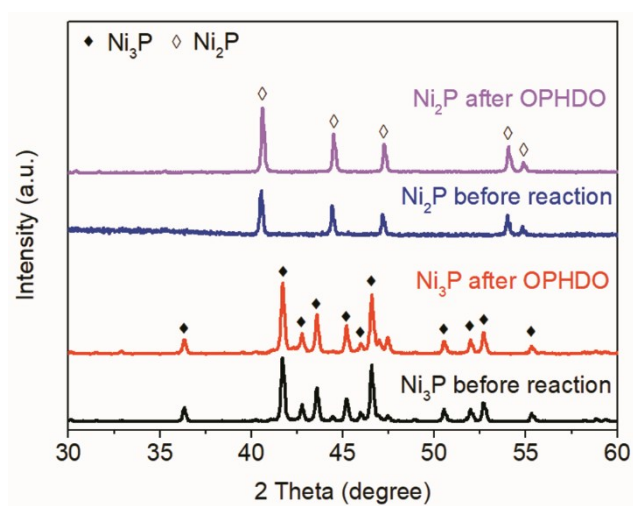

**Fig. S8** XRD patterns of the catalysts (unsupported  $\text{Ni}_3\text{P}$  and  $\text{Ni}_2\text{P}$ ) before and after oil phase HDO of phenol.

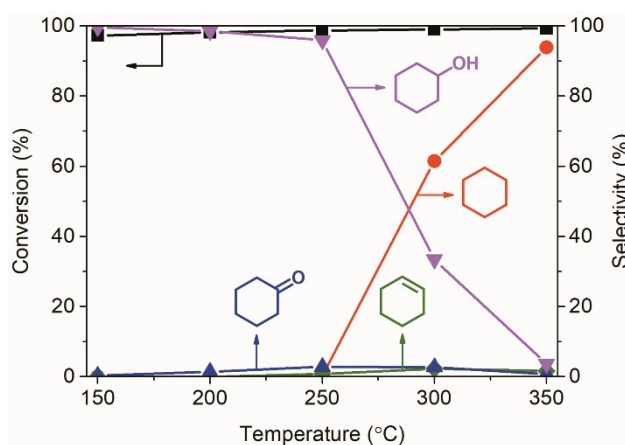

**Fig. S9** Catalytic performance of unsupported Ni<sub>3</sub>P in aqueous phase HDO of phenol (1.0 wt%).

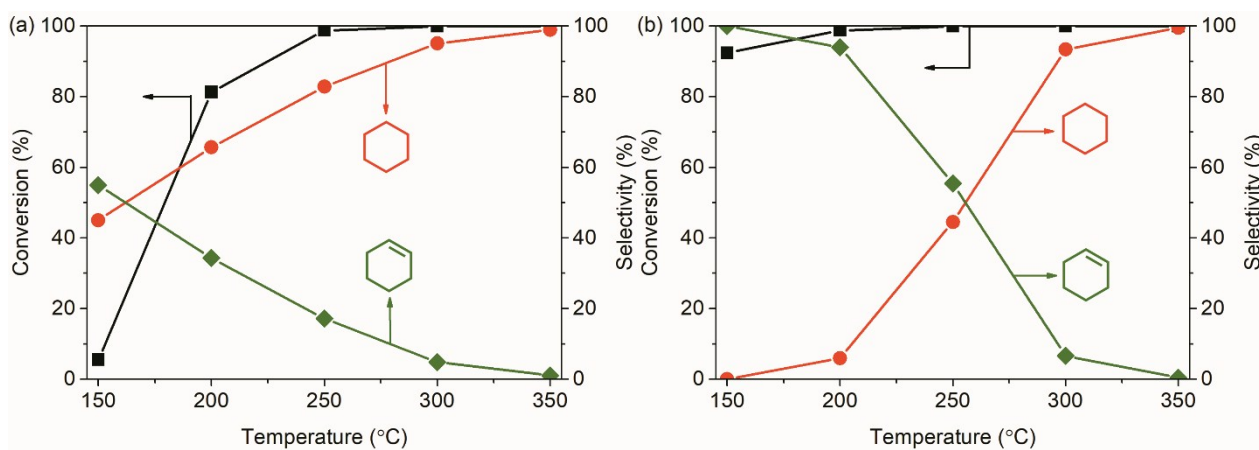

**Fig. S10** Variation of cyclohexanol conversion and product selectivities with temperature in oil phase HDO over unsupported (a) Ni<sub>3</sub>P and (b) Ni<sub>2</sub>P.
